# Supplementary material
Source: PubMed Central journal article supplement (PMC8975608)
Supplement: mmc1.pdf [file mmc1.pdf]

Juiz de Fora, February 11th, 2022

## DECLARAÇÃO

I, Deyse Assis de Miranda, legally responsible for Good Deal Consultoria Linguística, official certification number 11986116000168, state that the article *ASSOCIATION BETWEEN UNDERWEIGHT OR EXCESS BODY WEIGHT BEFORE SARS-COV-2 INFECTION AND CLINICAL OUTCOMES OF COVID-19: MULTICENTER STUDY* was properly grammatically reviewed by a professional English reviewer. I also state that we are open to make any other correction requested by the publisher, in order to adjust the text to its specific requirements.

No further considerations.

Sincerely,



Deyse Assis de Miranda  
Diretora Executiva
